# Supplementary figures and images for: Detection of particle layers in backscatter profiles: application to Antarctic lidar measurements
Source: Copernicus journal article supplement (doi:10.5194/acp-12-3205-2012), 2012-04-03

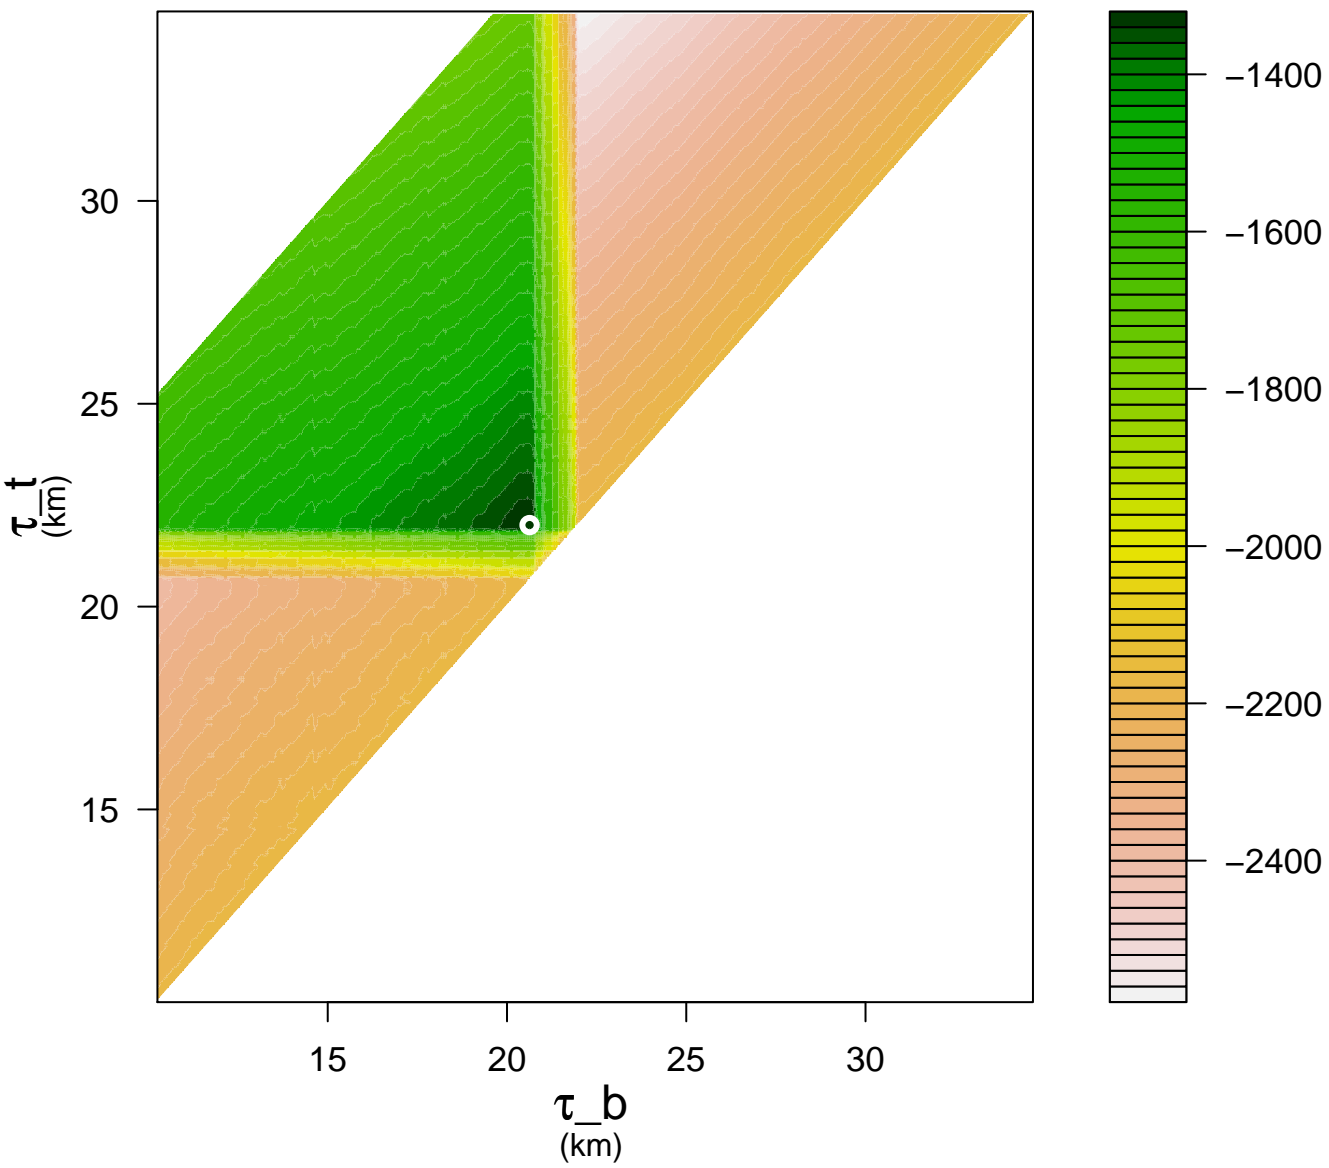

Supplement: Supplementary file 1 [file acp-12-3205-2012-supplement.zip]

Without PSC

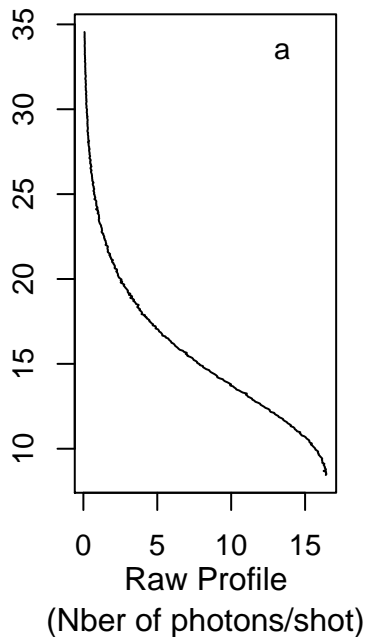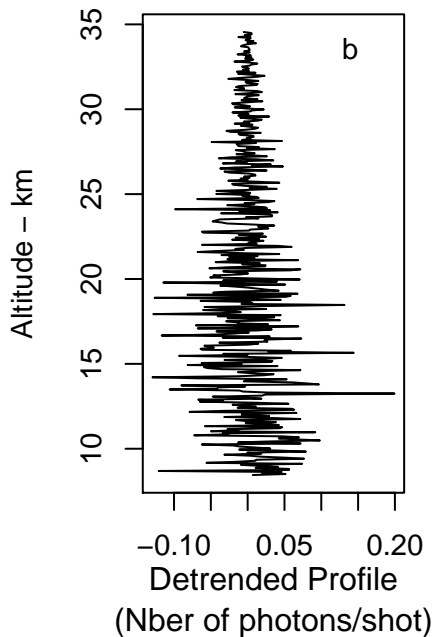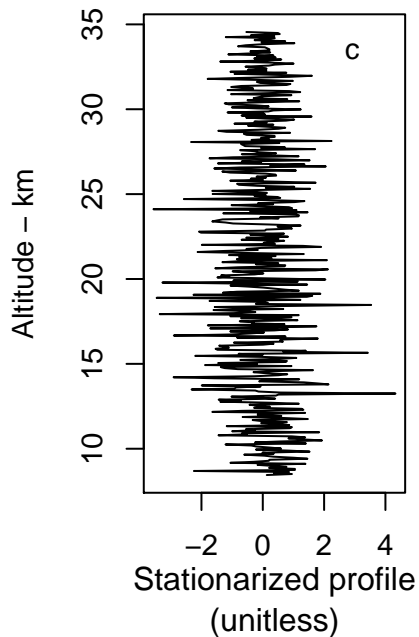

With PSC

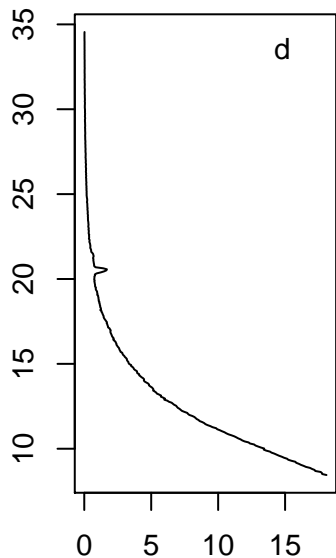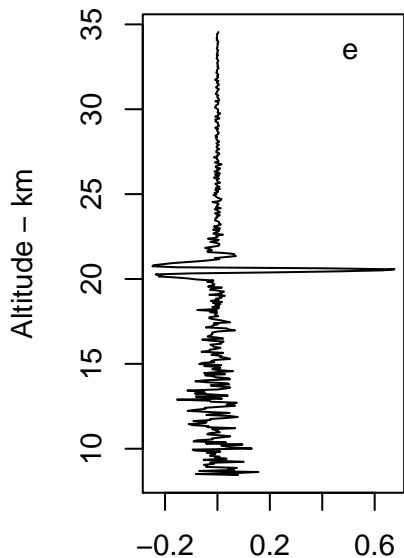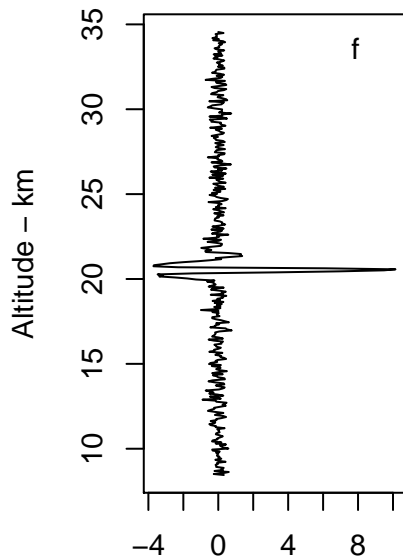

Supplement: Supplementary file 2 [file acp-12-3205-2012-supplement.zip]

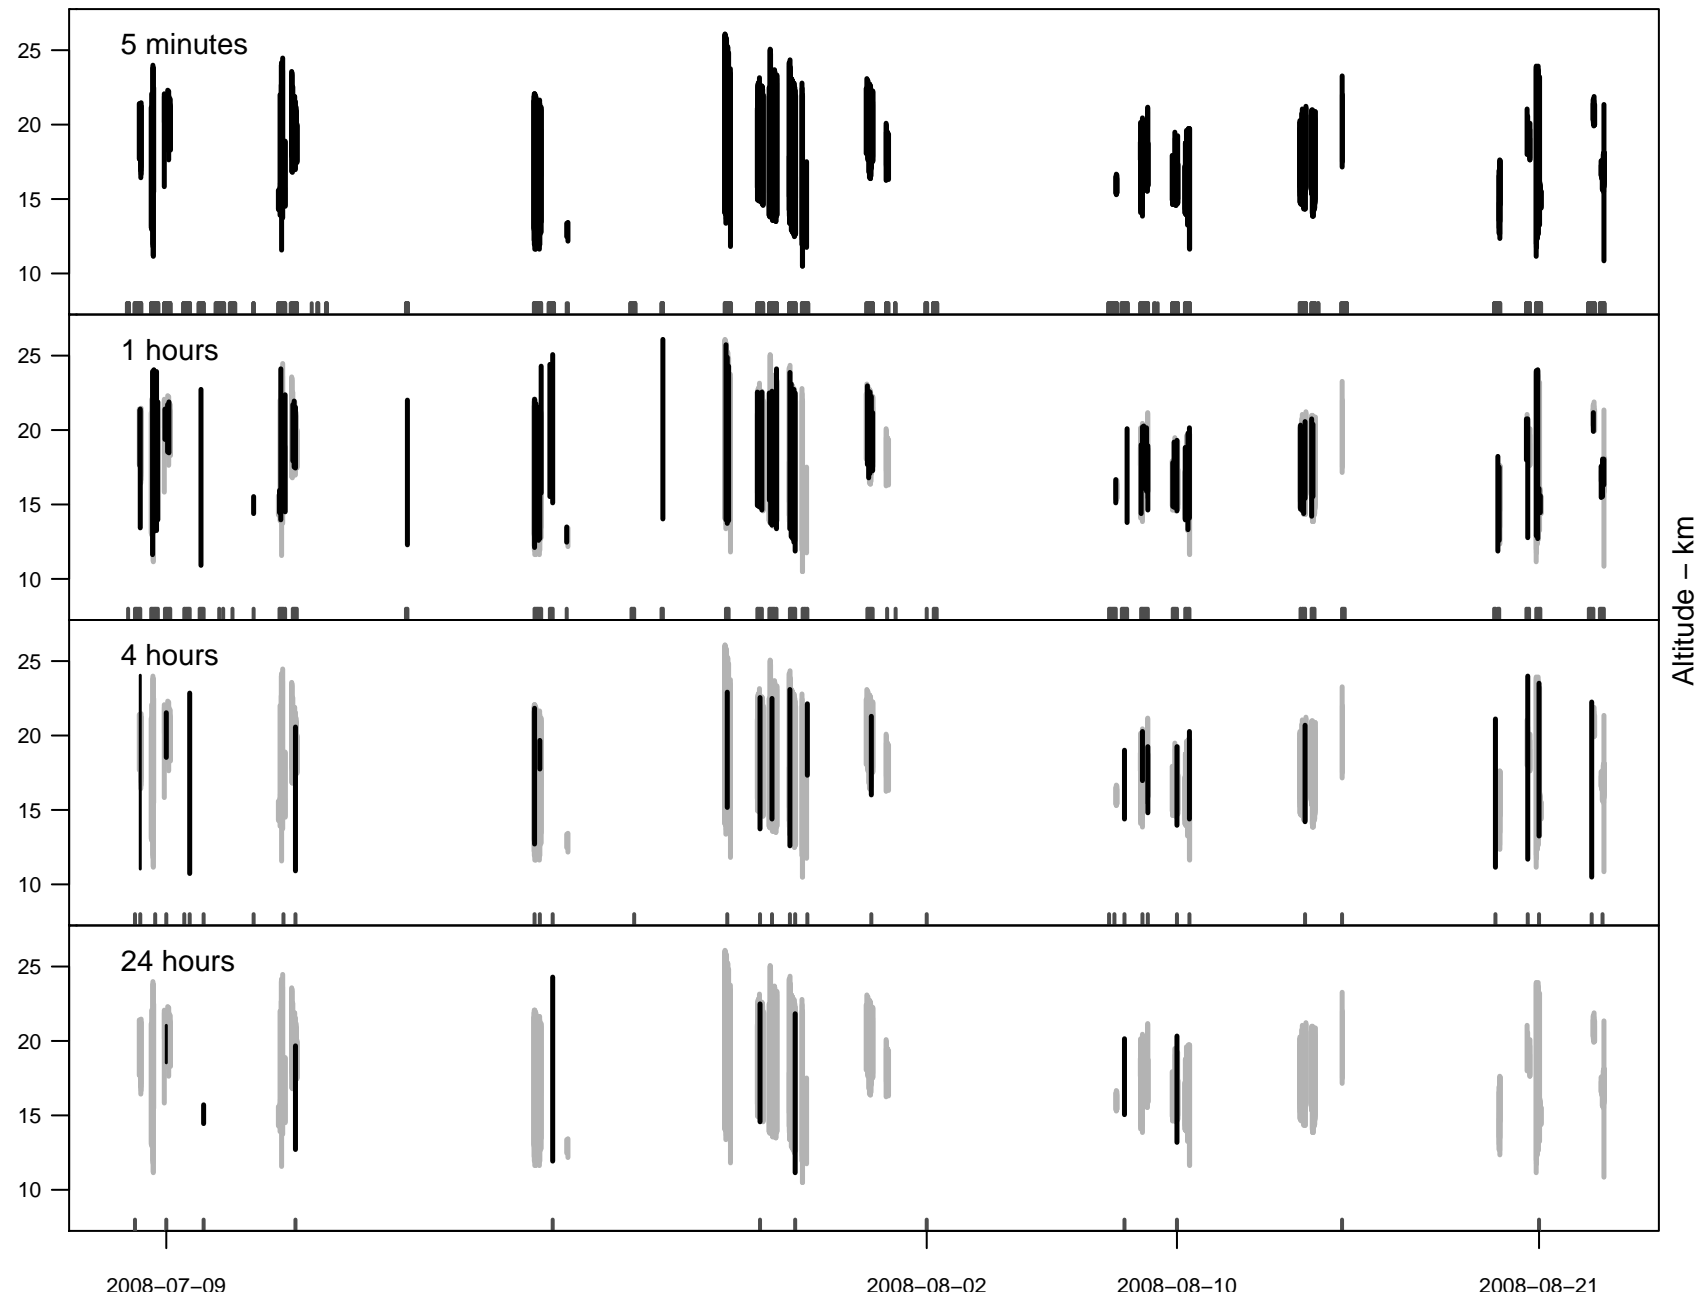

Supplement: Supplementary file 3 [file acp-12-3205-2012-supplement.zip]

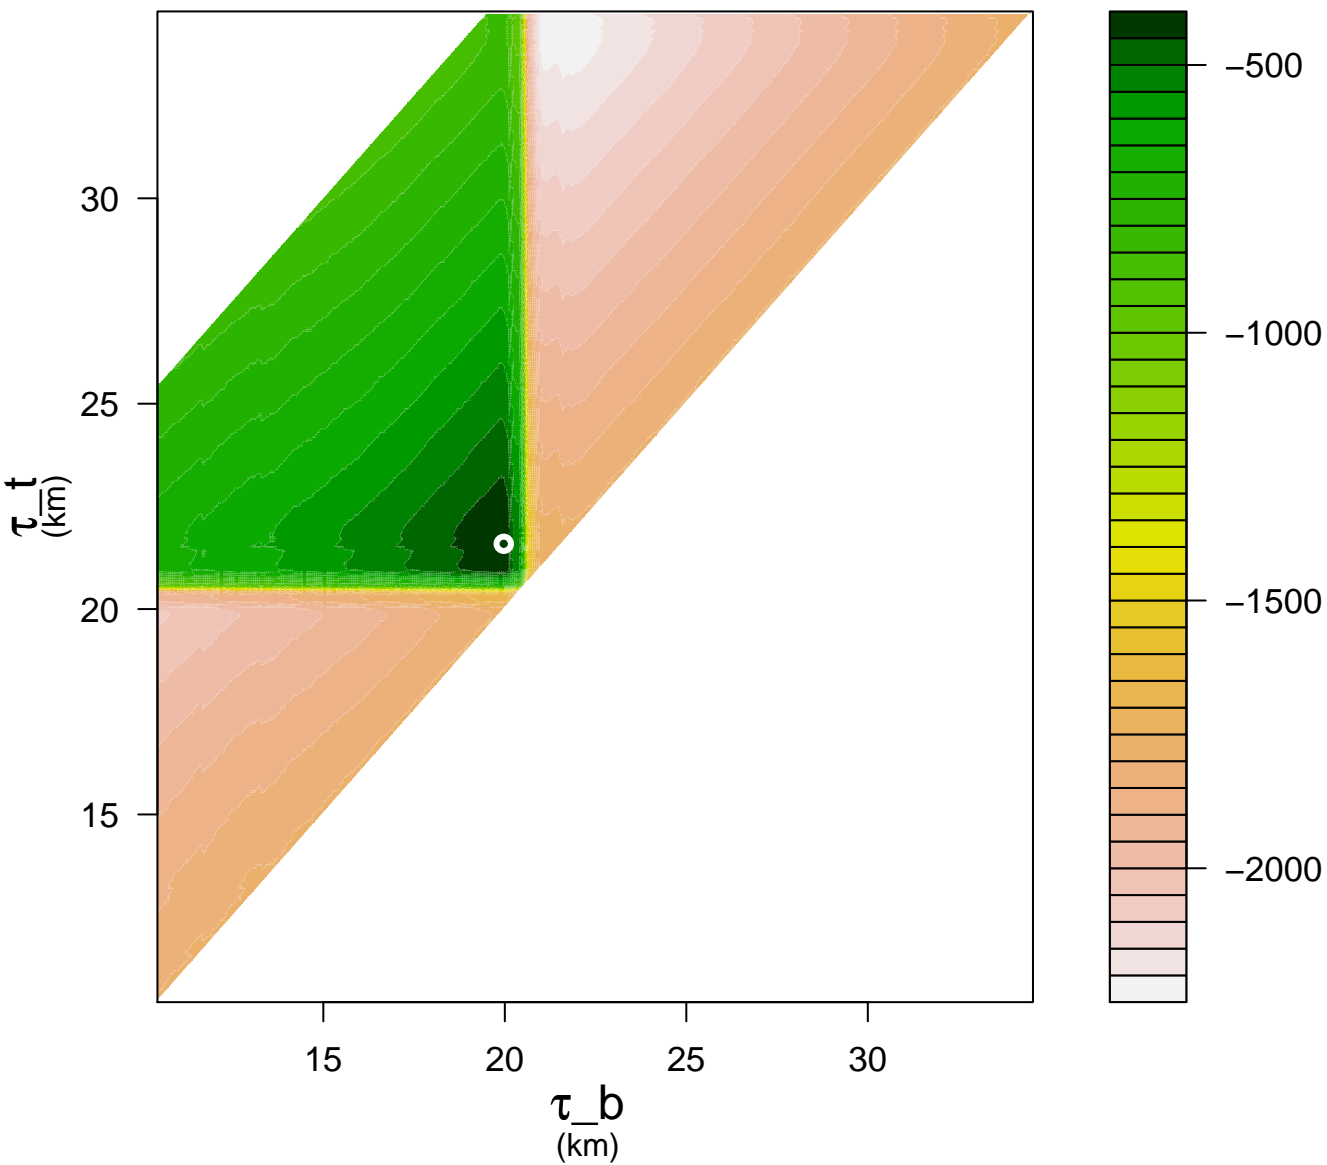

Supplement: Supplementary file 4 [file acp-12-3205-2012-supplement.zip]

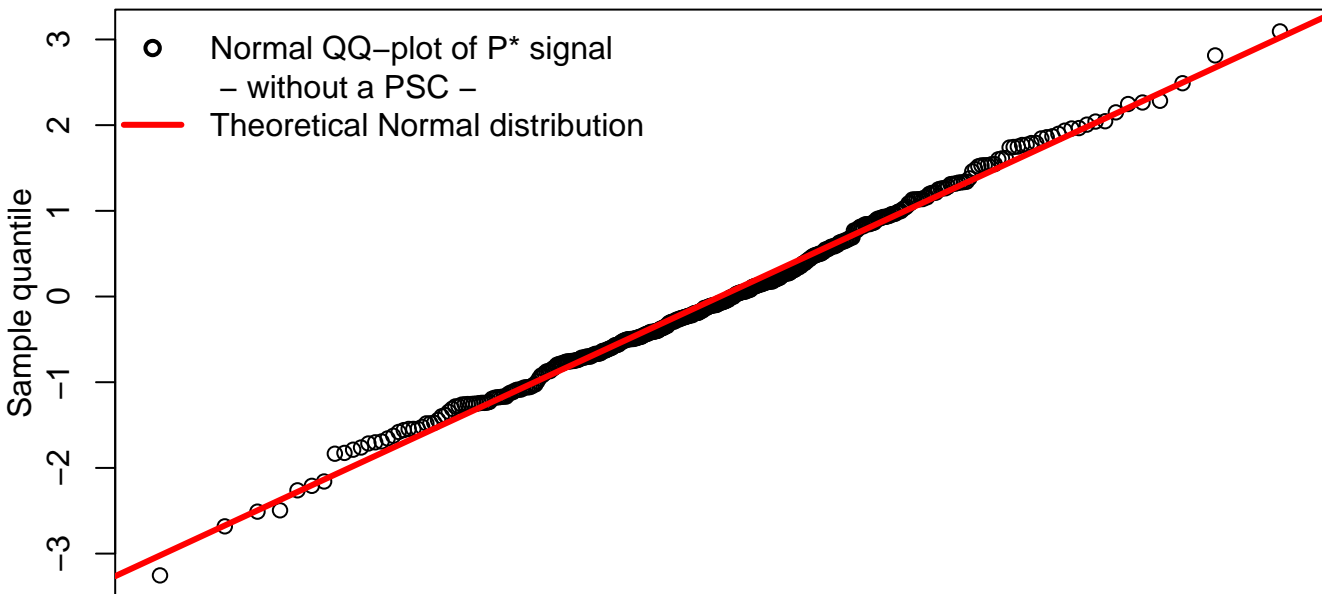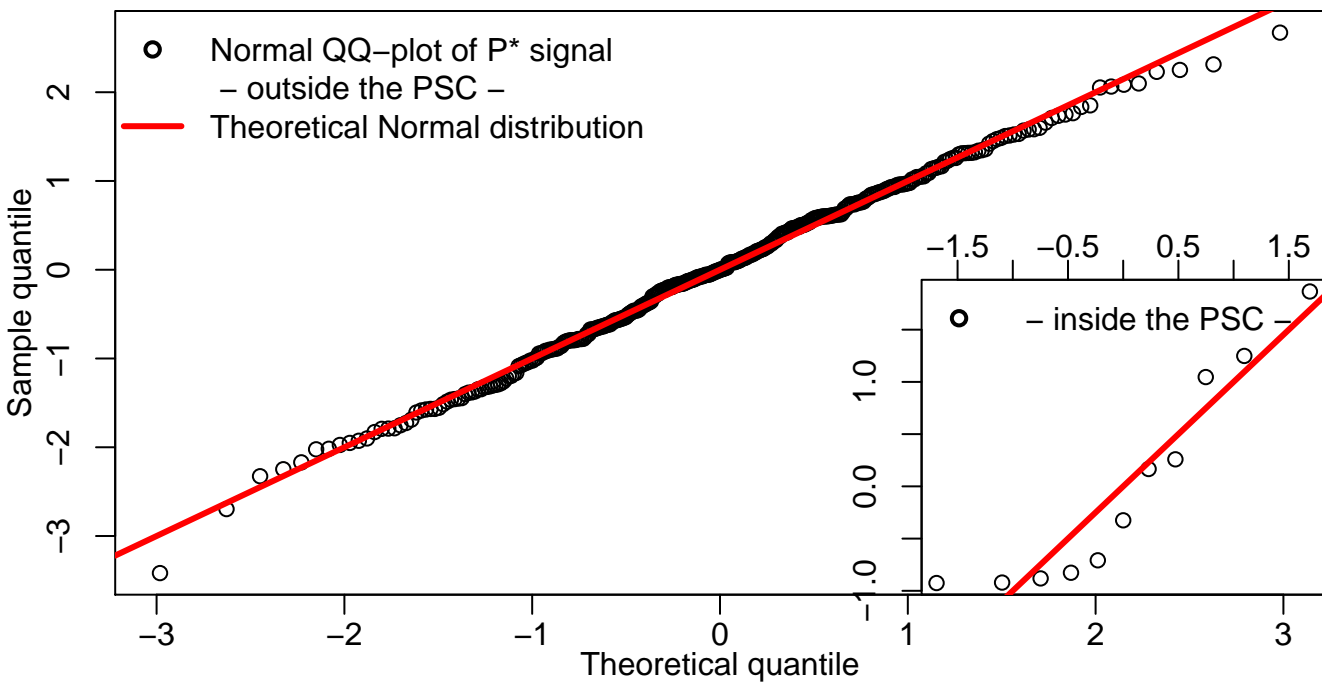

Supplement: Supplementary file 5 [file acp-12-3205-2012-supplement.zip]

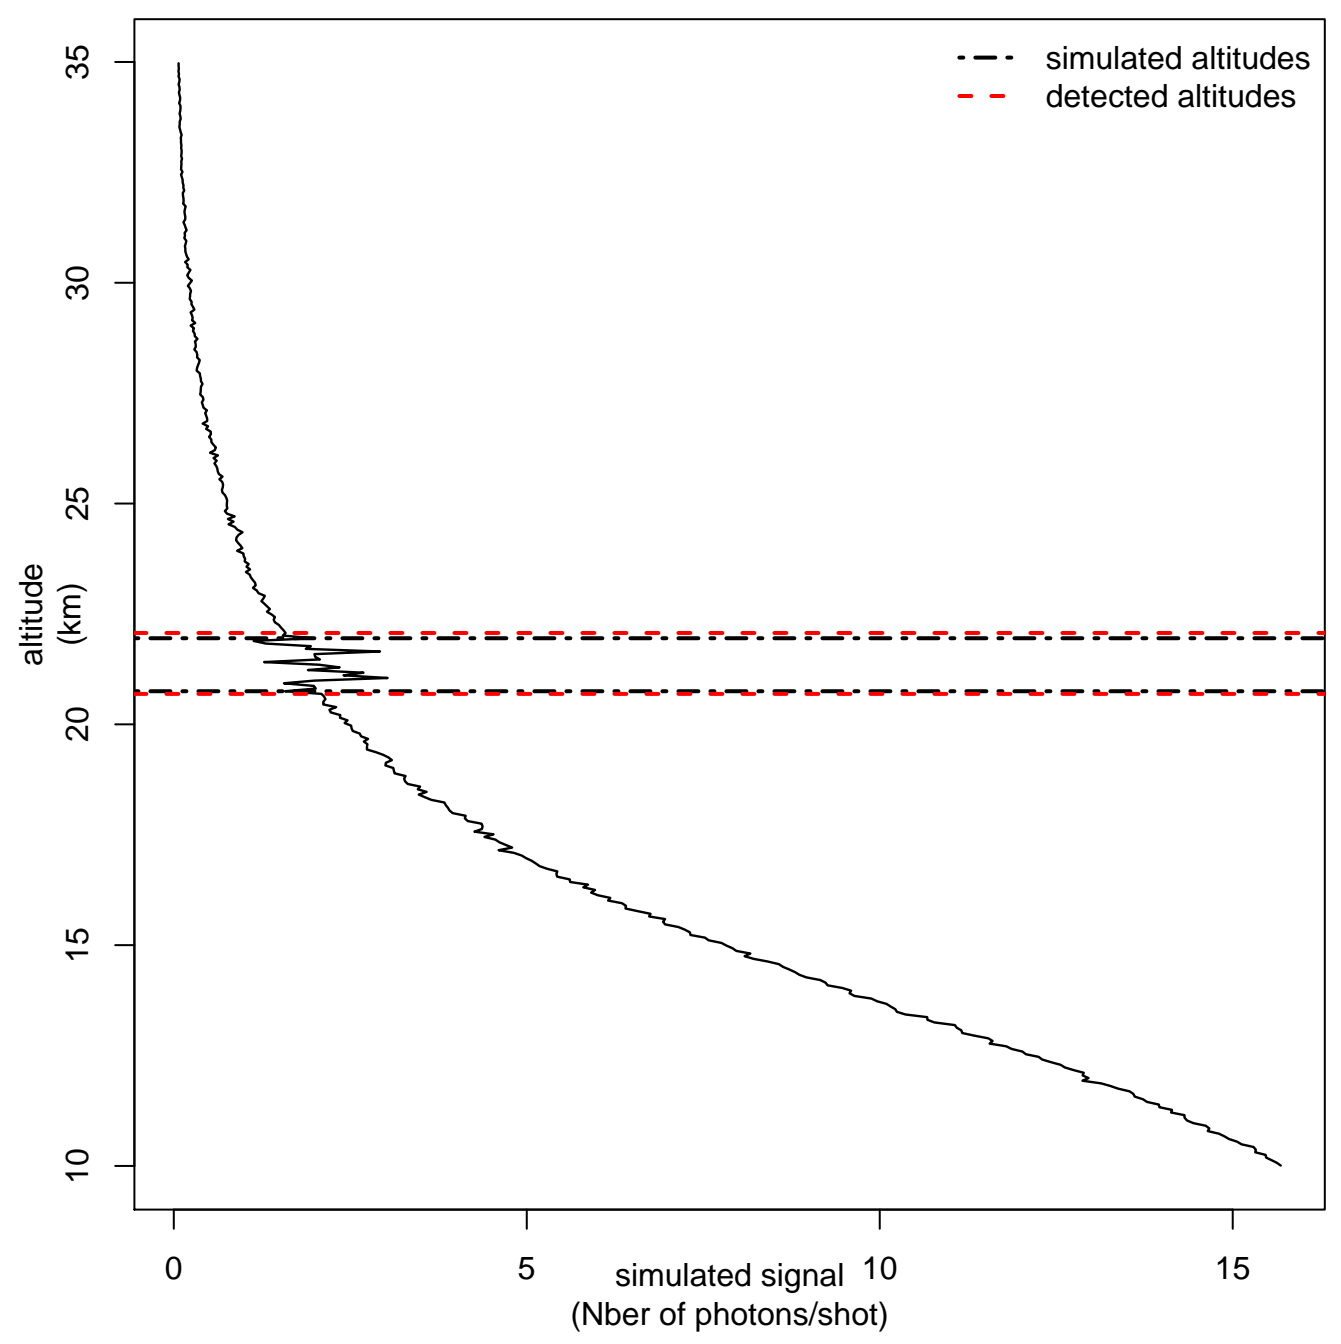

Supplement: Supplementary file 6 [file acp-12-3205-2012-supplement.zip]

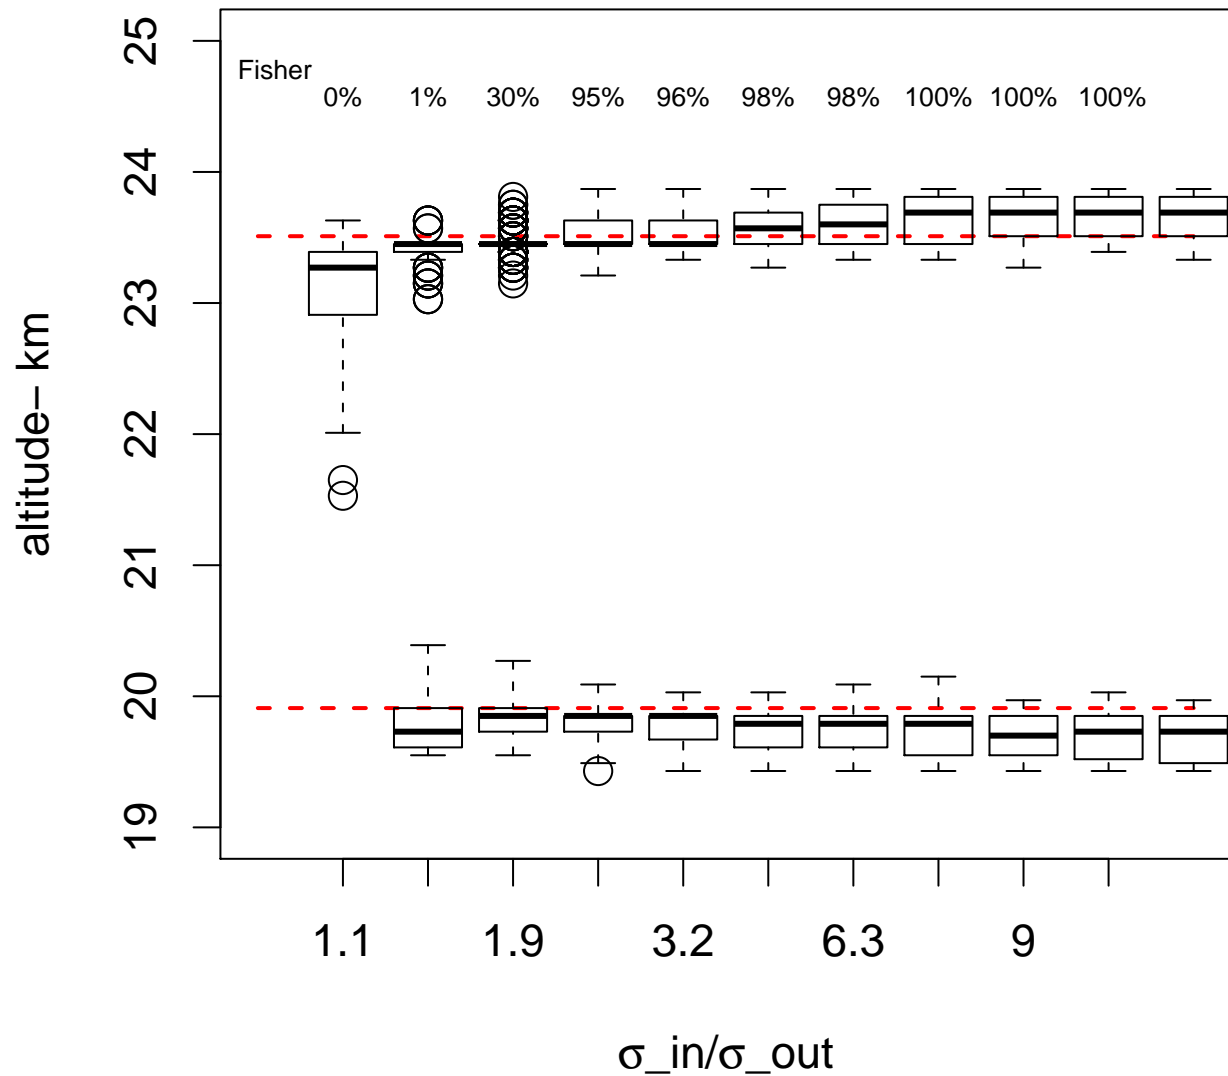

Supplement: Supplementary file 7 [file acp-12-3205-2012-supplement.zip]

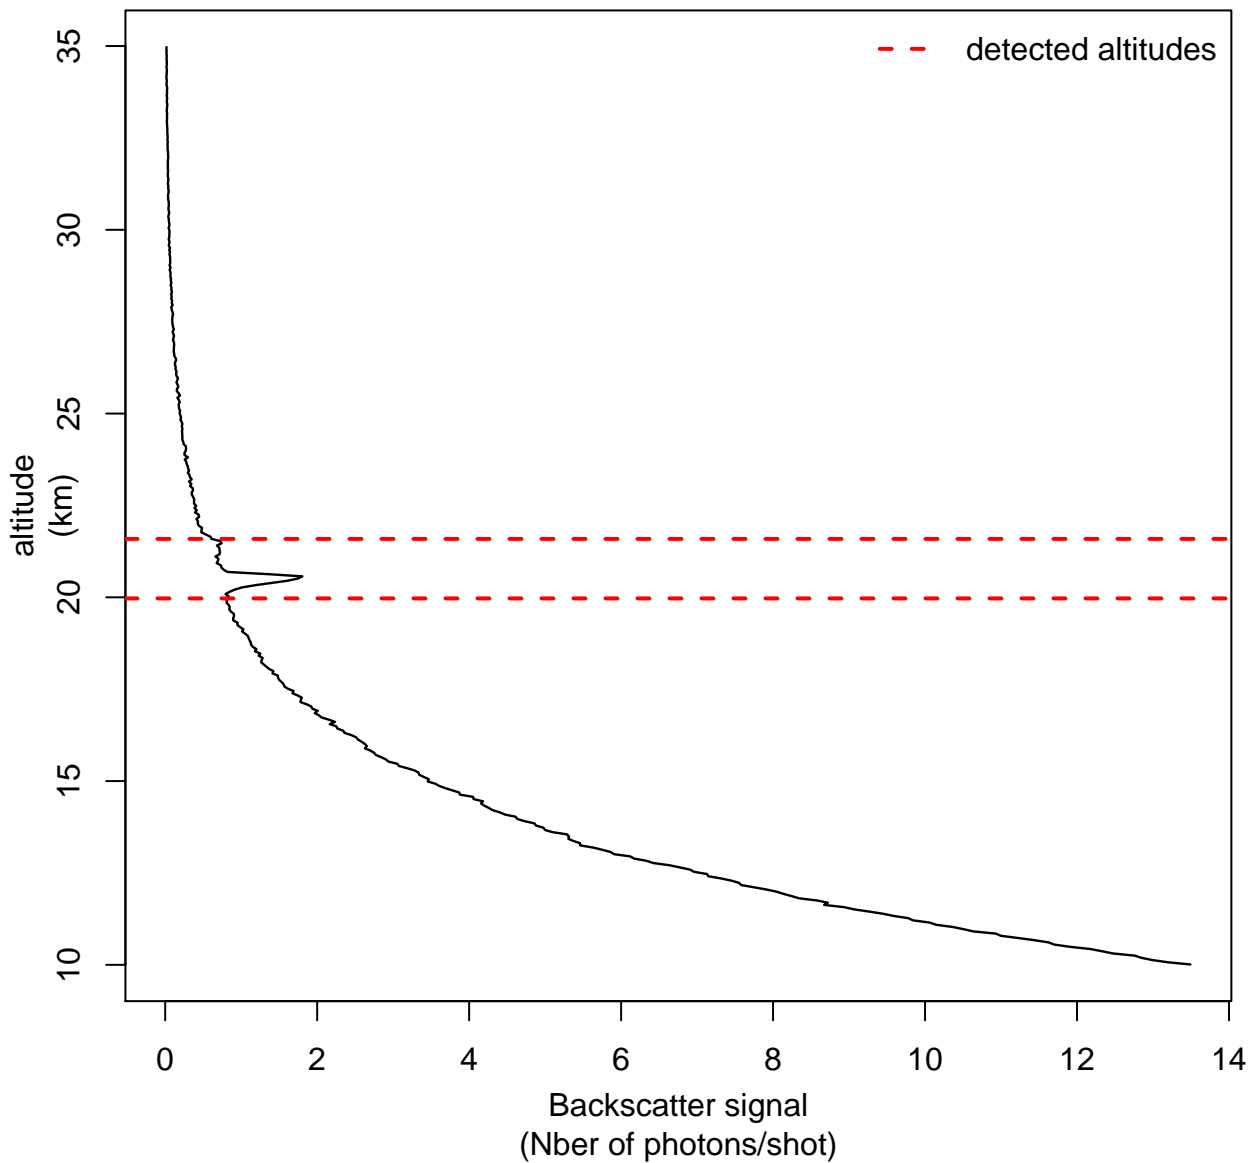

Supplement: Supplementary file 8 [file acp-12-3205-2012-supplement.zip]
